# Supplementary material for: A reusable, insoluble polymer-bound bis(oxazoline) (IPB-box) for highly enantioselective heterogeneous cyclopropanation reactionsElectronic supplementary information (ESI) available: experimental. See http://www.rsc.org/suppdata/cc/b3/b306483b/
Source: Royal Society of Chemistry journal article supplement (doi:10.1039/b306483b), 2003-01-01
Supplement: b306483b.doc [file b306483b.doc]

**Supplementary Information**

**A reusable, insoluble polymer-bound bis(oxazoline) (IPB-box) for highly enantioselective heterogeneous cyclopropanation reactions.**

Alessandro Mandoli,*a* Simonetta Orlandi,*a* Dario Pini*a* and Piero Salvadori*a**

*aDipartimento di Chimica e Chimica Industriale, Via Risorgimento 35, Pisa, Italy. Fax: +39-050-918409; Tel: +39-050-918273; E-mail: psalva@dcci.unipi.it*

**General.** Solvents were freshly distilled under nitrogen, from proper drying agents. Monomers were distilled under reduced pressure and stored under nitrogen. Reactions involving sensitive compounds were carried out under dry nitrogen, in flame-dried glassware. 1H-NMR (200 MHz) and 13C-NMR (50 MHz) spectra were recorded using a Varian Gemini 200 spectrometer, using TMS as internal reference. SEM analysis were carried out at the Dipartimento di Ingegneria Chimica e Chimica Industriale, Università di Pisa, using a JEOL 5600 LV instrument.

**Preparation of 4-(4-vinylbenzyloxy)butyl p-toluenesulphonate 1.** In a 100 ml two necked flask, 4-(4-vinylbenzyloxy)butanol[[1]](#endnote-2) (8.05 g, 39 mmol), Et3N (11 mL, 79 mmol) and 4-dimethylaminopyridine (0.48 g, 3.9 mmol) were dissolved with 10 ml of dry CH2Cl2. After cooling with an ice bath, a solution of p-toluenesulphonyl chloride (8.96 g, 47 mmol) in dry CH2Cl2 (25 mL) was slowly added and the mixture was stirred at the same temperature, until disappearance of the starting alcohol (TLC). The resulting suspension was washed with water (3  20 mL) and the aqueous layer was back-extracted with CH2Cl2 (3  10 mL). The combined organic extracts were dried over Na2SO4 and concentrated in vacuo to give a residue that was purified by flash chromatography (SiO2, n-hexane : AcOEt = 3 : 2). **1** was obtained in 79% yield, as a clear oil.

Rf = 0.60 (SiO2, n-hexane : AcOEt = 3 : 2)

1H-NMR (CDCl3)  (ppm): 1.70 (m, 4H), 2.40 (s 3H), 3.20 (t, J= 6 Hz, 2H), 4.05 (t, J= 6 Hz, 2H), 4.42 (s, 2H), 5.25 (d, J= 9 Hz, 1H), 5.75 (d, J= 15 Hz, 1H), 6.70 (dd, J1= 9 Hz, J2= 15 Hz, 1 H), 7.35 (m, 6H), 7.80 (d, J= 8 Hz, 2H).

13C-NMR (CDCl3)  (ppm): 21.5, 25.6, 25.8, 69.1, 70.3, 72.5, 113.5, 126.1, 127.6, 127.7, 129.6, 133.2, 136.4, 136.8, 137.3, 144.5.

**Preparation of diethyl methyl-[4-(4-vinylbenzyloxy)butyl]malonate 2.** In a 100 ml two necked flask, fitted with a dropping funnel, reflux condenser and magnetic stirring bar, NaH (0.96 g of 60% dispersion in mineral oil, 24 mmol) was suspended in dry THF (18 mL). The flask was placed in an ice bath and a solution of diethyl methylmalonate (3.40 mL, 19.6 mmol), in dry THF (5 mL), was added dropwise. After stirring at the same temperature for 30 min, the suspension was allowed to warm to r.t. and a solution of **1** (7.75 g, 21.5 mmol) in dry THF (10 mL) was added. The mixture was then heated to reflux, monitoring the consumption of diethyl methylmalonate by GLC. After adding saturated aqueous NH4Cl (40 mL), THF was removed at 20 mmHg and the mixture was extracted wit Et2O (3  30 mL). The combined organic extracts were washed with water until neutral and dried over Na2SO4. The solvent was removed under reduced pressure and the residue was purified by flash chromatography (SiO2, pet. ether : AcOEt = 9 : 1), affording. **2** in 65% yield, as a clear oil.

Rf = 0.21 (SiO2, pet. ether: AcOEt = 9:1)

1H-NMR (CDCl3)  (ppm): 1.21 (t, J= 8 Hz, 6H), 1.40 (s, 3 H), 1.61 (t, J= 8 Hz, 2H), 1.88 (m, 4H), 3.45 (t, J= 8 Hz, 2H), 4.16 (q, J= 8Hz, 4H), 4.46 (s, 2H), 5.21 (d, J= 10 Hz, 1H), 5.73 (d, J= 18 Hz, 1H), 6.70 (dd, J1= 10 Hz, J2= 18 Hz, 1 H), 7.26 (d, J= 8 Hz, 2H), 7.31 (d, J= 8 Hz, 2H).

13C-NMR (CDCl3)  (ppm): 13.9, 19.6, 20.3, 29.8, 35.2, 53.5, 60.9, 69.7, 72.4, 113.5, 125.2, , 126.9, 127.6, 128.4, 138.7, 172.2.

**Preparation of methyl-[4-(4-vinylbenzyloxy)butyl]malonic acid 3.** A 25 ml two necked flask, fitted with a reflux condenser and magnetic stirring bar, was charged with the ester **2** (4.00 g, 11.0 mmol) and aqueous 18 M KOH (4 mL), refluxing the mixture until disappearance of the upper organic layer. The basic aqueous phase was washed with Et2O (2  5 mL) and carefully acidified (pH 1) with concentrated hydrochloric acid, while cooling in an ice bath. The resulting suspension was extracted with AcOEt (3  10 mL), washing the combined organic phases with water until neutral. After drying over Na2SO4, the solvent was removed in vacuo, obtaining **3** as a colourless solid in 86% yield.

M.p. 91-94°C

1H-NMR (CDCl3)  (ppm): 1.2-1.3 (m, 2H), 1.40 (s, 3H), 1.5-1.6 (m, 2H), 1.8-1.9 (m, 2H), 3.45 (t, J= 8 Hz, 2H), 4.45 (s, 2H), 5.20 (d, J= 10 Hz, 1H), 5.70 (d, J= 16 Hz, 1H), 6.70 (dd, J1= 10 Hz, J2= 16 Hz, 1 H), 7.26 (d, J= 8 Hz, 2H), 7.30 (d, J= 8 Hz, 2H), 10.80 (br. s , 2H).

13C-NMR (CDCl3)  (ppm): 19.8, 21.0, 29.6, 35.3, 53.5, 69.7, 72.6, 113.7, 125.4, 127.8, 128.6, 136.4, 177.5.

**Preparation of methyl-[4-(4-vinylbenzyloxy)butyl]malonyl chloride 4.** A 50 ml two necked flask, fitted with a magnetic stirring bar, was charged with the acid **3** (1.47 g, 4.80 mmol), DMF (48 L) and CH2Cl2 (8 mL). The flask was placed in an ice bath and oxalyl chloride (1.25 mL, 14.3 mmol) was added dropwise, allowing the solution to warm to r.t. overnight. The volatiles were removed in vacuo (20 mmHg), obtaining **4** as a yellow-brownish oil that was directly used in the following step.

1H-NMR (CDCl3)  (ppm): 1.3-1.5 (m, 2H), 1.6-1.7 (m, 5H), 2.1-2.2 (m, 2H), 3.45 (t, J= 6 Hz, 2H), 4.45 (s, 2H), 5.20 (d, J = 10 Hz, 1 H), 5.70 (d, J = 16 Hz, 1 H), 6.70 (dd, J1 = 10 Hz, J2 = 16 Hz, 1 H), 7.4 (m, 4H).

13C-NMR (CDCl3)  (ppm): 20.2, 20.8, 29.65, 35.6, 69.4, 72.7, 113.8, 125.5, 127.1, 127.9, 128.6, 136.7, 171.5.

**Preparation of 2,2-bis{2-[(4S)-(*tert*-butyl)-1,3-oxazolinyl]}-6-(4-vinylbenzyloxy)hexane 5.** The monomer **5** was prepared in 55% overall yield from 4, following the procedure by Evans.[[2]](#endnote-3),[[3]](#endnote-4)

Rf = 0.72 (SiO2, AcOEt: MeOH = 99:1)

ISI-MS (*m/z*) 469 (M+H)+, 491 (M+Na)+

[]25D = - 56.0 (c 1.24, MeOH)

IR (KBr): 2954, 2902, 2868, 1737, 1660, 1625, 1479, 1394, 1364, 1237, 1209, 1107, 979, 924, 825, 731.

1H-NMR (CDCl3)  (ppm): 0.90 (s, 18H), 1.2-1.4 (m, 2H), 1.45 (s, 3H), 1.47-1.65 (m, 2H), 1.8-2.0 (m, 2H), 3.3-3.4 (m, 2H), 3.7-3.8 (m, 2H), 3.9-4.1 (m, 4H), 4.50 (s, 2H), 5.25 (d, J = 11 Hz, 1 H), 5.75 (d, J = 17 Hz, 1H), 6.70 (dd, J1 = 11 Hz, J2 = 17 Hz, 1H), 7.1-7.4 (m, 4H).

13C-NMR (CDCl3)  (ppm): 20.9, 21.2, 25.6, 29.8, 33.6, 36.1, 42.2, 68.5, 70.1, 72.5, 75.2, 75.3, 113.7, 126.8, 128.3, 135.6, 137.6, 139.8, 167.8.

**Preparation of the supported ligand** **6**. A polymerisation vial was charged with a solution of the monomer **5** (680 mg, 1.45 mmol) in toluene (1.67 ml, ~35% v/v) that was degassed by three freeze-thaw cycles. Distilled divinylbenzene (tech. grade, 1.48 ml, 10.4 mmol) and styrene (1.0 ml, 8.7 mmol) were added, followed by AIBN (25.5 mg, 0.9% wt/wt respect to the monomers). The vial was closed and immersed in an oil bath heated at 80°C, observing phase separation in about 1 h. After 18 h, the volatiles were removed in vacuo (0.1 mmHg) and the glassy polymer was crushed and continuously extracted with CH2Cl2 and THF in a Soxhlet device, until disappearance of aromatic compounds in the washings (UV check). After drying in vacuo, 2.68 g (91% yield) of white polymeric material **6** was obtained.

Elemental analysis: C 90.05, H 8.58, N 0.87%.

IR (KBr): 3024, 2921, 2850, 1655, 1601, 1450, 1088, 1027, 1018, 756, 692, 494.

**Heterogeneous cyclopropanation procedure**. Cu(OTf)2 (0.020 mmol) and the polymeric ligand **6** (0.036 mmol of supported ligand) were stirred in dry THF, affording a green material that was filtered, washed and dried. After reduction of Cu(II) to Cu(I), with a little amount of ethyl diazoacetate in refluxing CH2Cl2, the alkene (2-150 mmol) was added at 0°C, followed by the slow addition of diazoacetate (1-20 mmol, see Table 1). Upon consumption of the diazoacetate, the crude product was separated by filtration, while the recovered catalyst could be reused after washing and drying.

1. H. Sellner, P. B. Rheiner, D. Seebach *Helv. Chim. Acta* **2002**, *85*, 352-387. [↑](#endnote-ref-2)
2. S. Orlandi, A. Mandoli, D. Pini, P. Salvadori, *Angew. Chem., Int. Ed. Engl.*, 2001, **40**, 2519-2521. [↑](#endnote-ref-3)
3. D. A. Evans, G. S. Peterson, J. S. Johnson, D. M. Barnes, K. R. Campos, K. A. Woerpel *J. Org.Chem.* **1998**, *63*, 4541-4544. [↑](#endnote-ref-4)
